# Supplementary material for: Long Non-Coding RNAs Might Regulate Phenotypic Switch of Vascular Smooth Muscle Cells Acting as ceRNA: Implications for In-Stent Restenosis
Source: MDPI journal article supplement (doi:10.3390/ijms23063074), 2022-03-12
Supplement: s1 [file s1]

Supplementary Table S1. Summary of mapping results for each sample

| Sample ID | Total read | Reads mapped | Unique mapped | Multi mapped |
|-----------|------------|--------------|---------------|--------------|
| Cont_1    | 141467314  | 94.5 %       | 71.2 %        | 23.3 %       |
| Cont_2    | 138907016  | 84.4 %       | 50.0 %        | 34.4 %       |
| Cont_3    | 146801934  | 92.3 %       | 66.9 %        | 25.7 %       |
| Stent_1   | 132026982  | 84.1 %       | 67.2 %        | 16.9 %       |
| Stent_2   | 116954322  | 83.9 %       | 66.9 %        | 17.0 %       |
| Stent_3   | 110719626  | 84.2 %       | 67.6 %        | 16.6 %       |

Cont\_ Contractile Human umbilical artery smooth muscle cells, Stent\_ Stent induced proliferative phenotype
