# Supplementary material for: Long Non-Coding RNAs Might Regulate Phenotypic Switch of Vascular Smooth Muscle Cells Acting as ceRNA: Implications for In-Stent Restenosis
Source: MDPI journal article supplement (doi:10.3390/ijms23063074), 2022-03-12
Supplement: s1 [file s1]

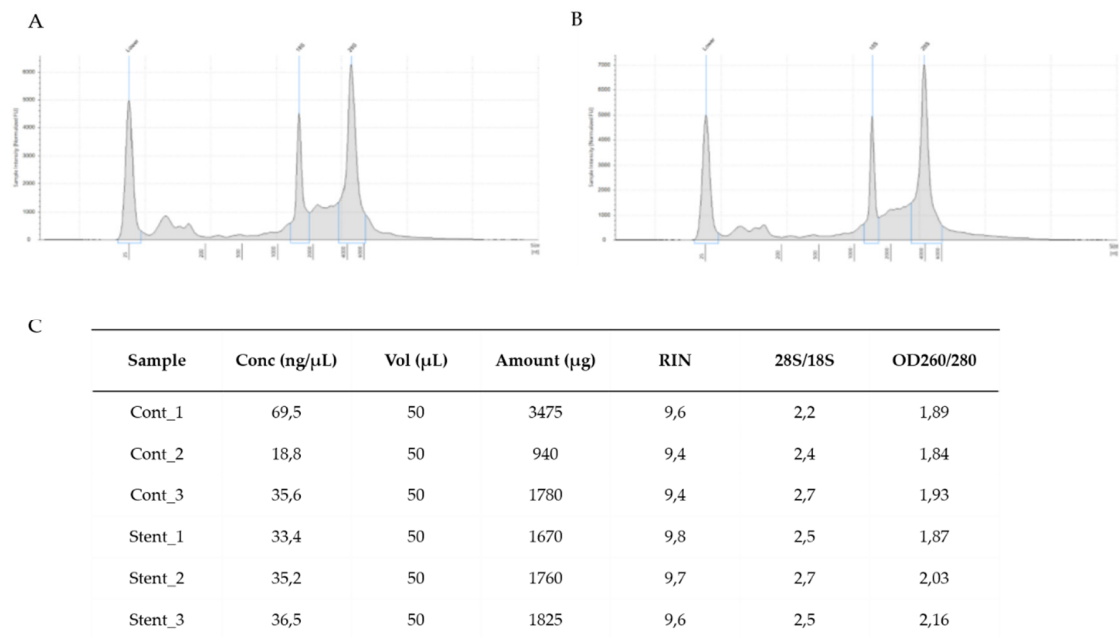

Supplementary Figure S1. RNA extraction quality control. RNA integrity was assessed by Agilent 4200. Panel **A** shows Cont\_1 and panel **B** shows Stent\_1 RNA analysis as a representative sample for each group. Panel **C** describes the characteristics of all samples. RIN, RNA integrity number, Cont\_ contractile vascular smooth muscle cells, Stent\_ Stent induced proliferative phenotype cells, OD optic density.
